# Supplementary material for: Solvent isotope effect and mechanism for the production of hydrogen and lactic acid from glycerol under hydrothermal alkaline conditions
Source: Royal Society of Chemistry journal article supplement (doi:10.1039/c2gc36153a), 2012-01-01

**Fig. S1** Gas chromatograms and MS spectra for the gas samples after the hydrothermal reactions of 0.33 M glycerol at 300 °C with (a) 1.25 M NaOH in H<sub>2</sub>O and (b) 1.25 M NaOD in D<sub>2</sub>O.

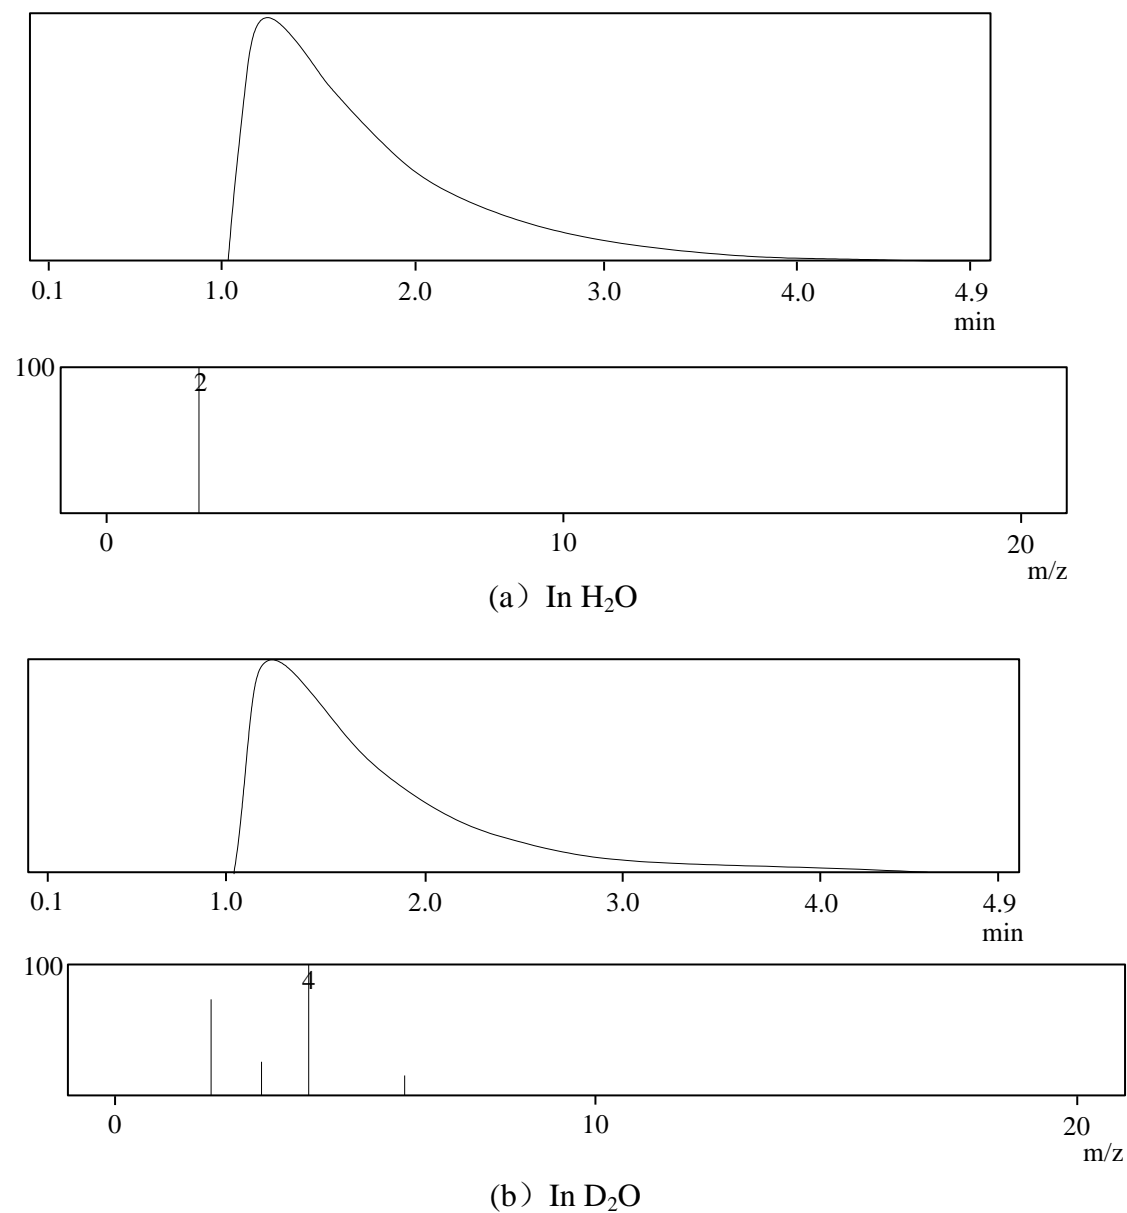

Supplement: c2gc36153a.pdf [file c2gc36153a.pdf]
